# Supplementary material for: Molecular-caged metal-organic frameworks for energy management
Source: PubMed Central journal article supplement — Sci Adv. 2024 May 8;10(19):eadl4449. doi: 10.1126/sciadv.adl4449 (PMC11078190; doi:10.1126/sciadv.adl4449), 2024-05-08
Supplement: sciadv.adl4449_sm.pdf [file sciadv.adl4449_sm.pdf]

Supplementary Materials for  
**Molecular-caged metal-organic frameworks for energy management**

Minghong Wu *et al.*

Corresponding author: Weiqi Xie, [weiqixie@csu.edu.cn](mailto:weiqixie@csu.edu.cn); Jianqing Zhao, [psjqzhao@scut.edu.cn](mailto:psjqzhao@scut.edu.cn)

*Sci. Adv.* **10**, ead14449 (2024)  
DOI: 10.1126/sciadv.adl4449

**This PDF file includes:**

Figs. S1 to S20  
Tables S1 to S4

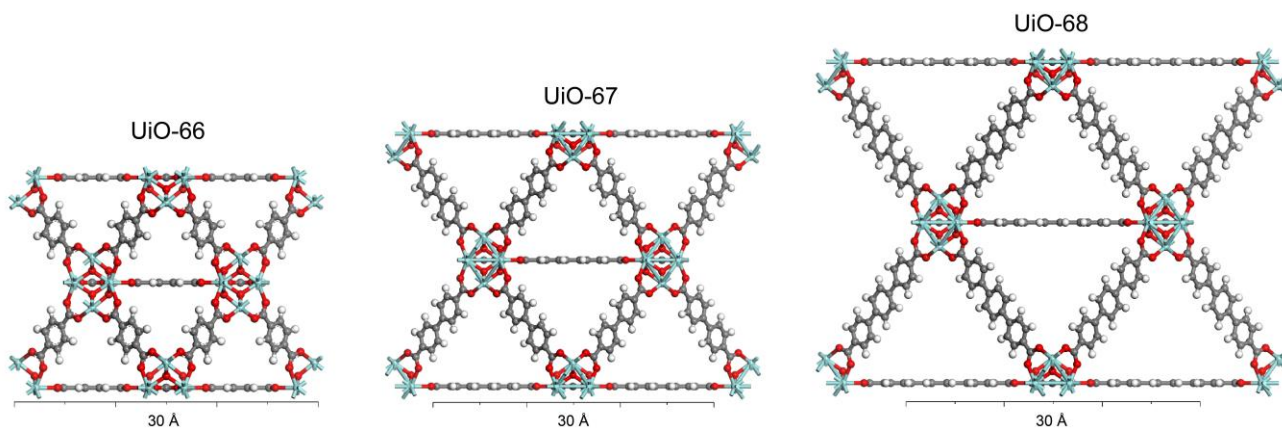

**Fig. S1** Framework structures of UiO-66, UiO-67 and UiO-68

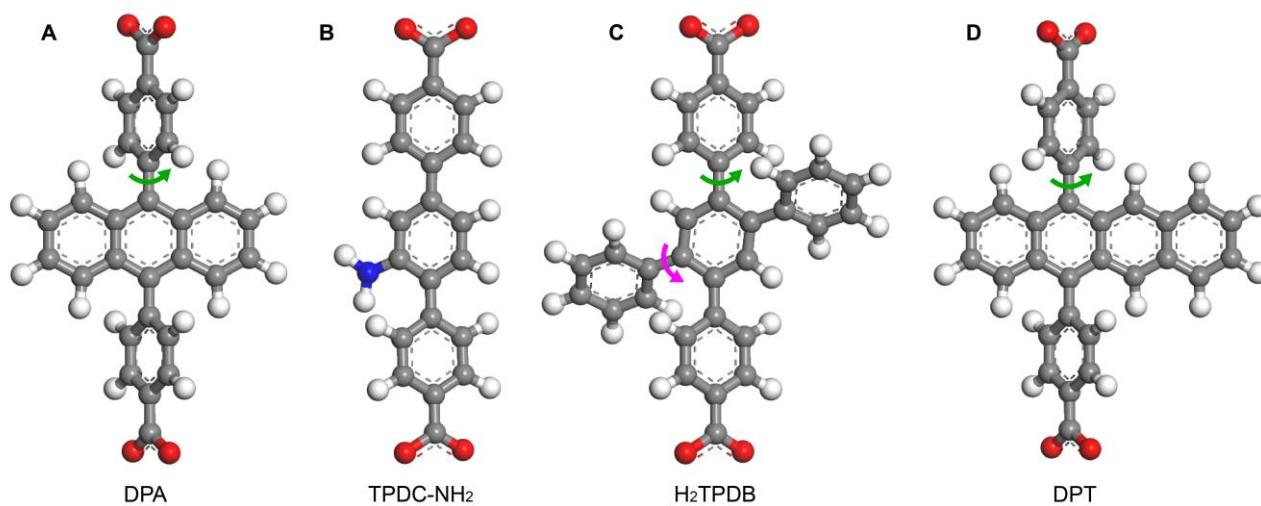

**Fig. S2** Ligand selection for constructing molecular cages

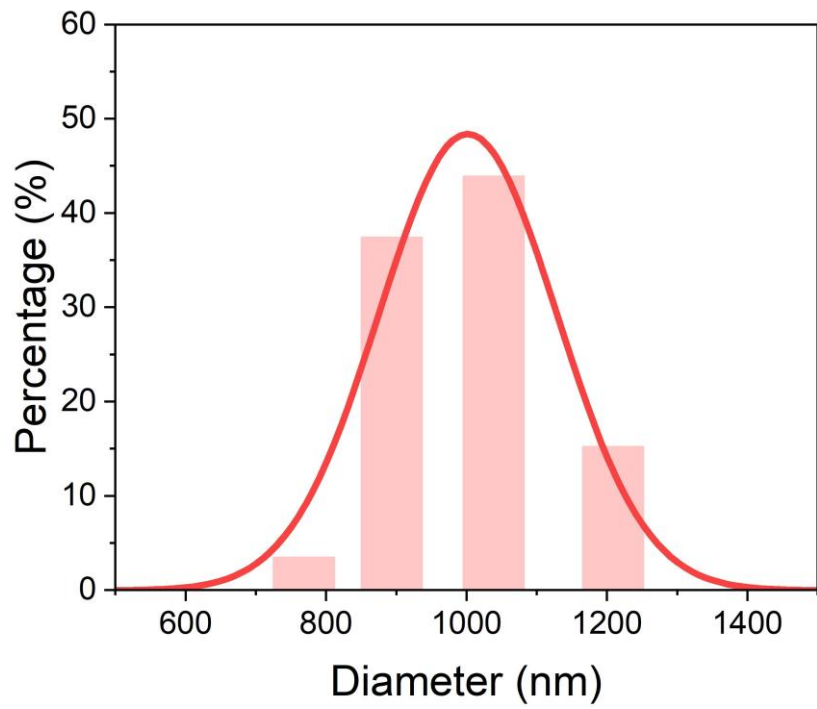

**Fig. S3** Particle size distribution of UiO-68

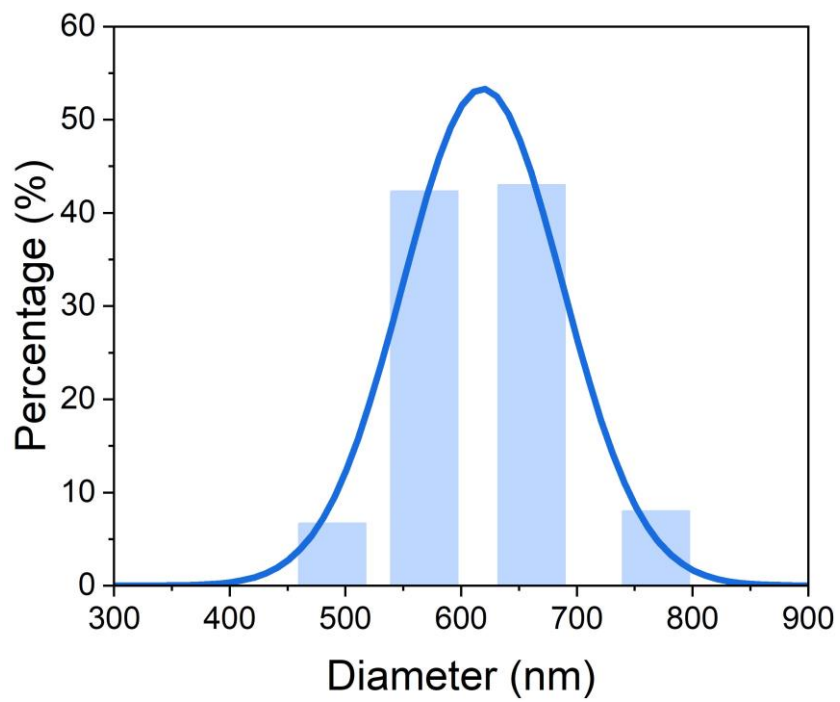

**Fig. S4** Particle size distribution of Zr-DPA

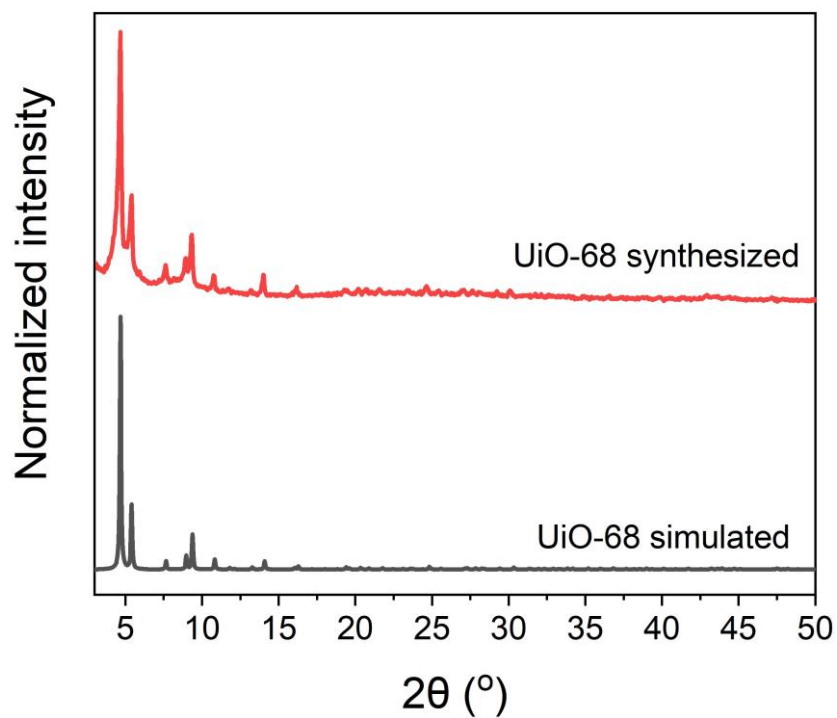

**Fig. S5** Synthesized and simulated UiO-68 XRD spectra

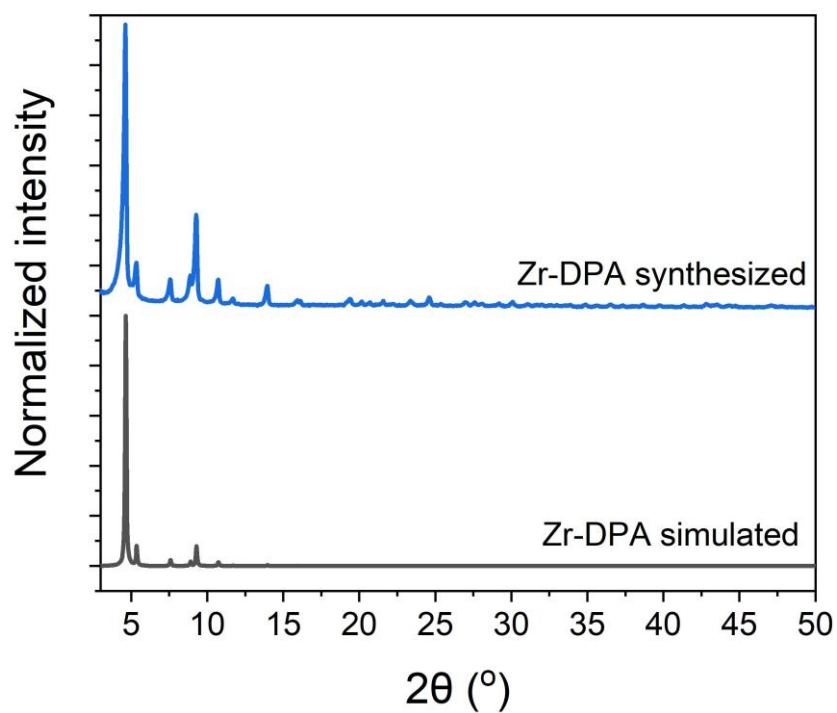

**Fig. S6** Synthesized and simulated Zr-DPA XRD spectra

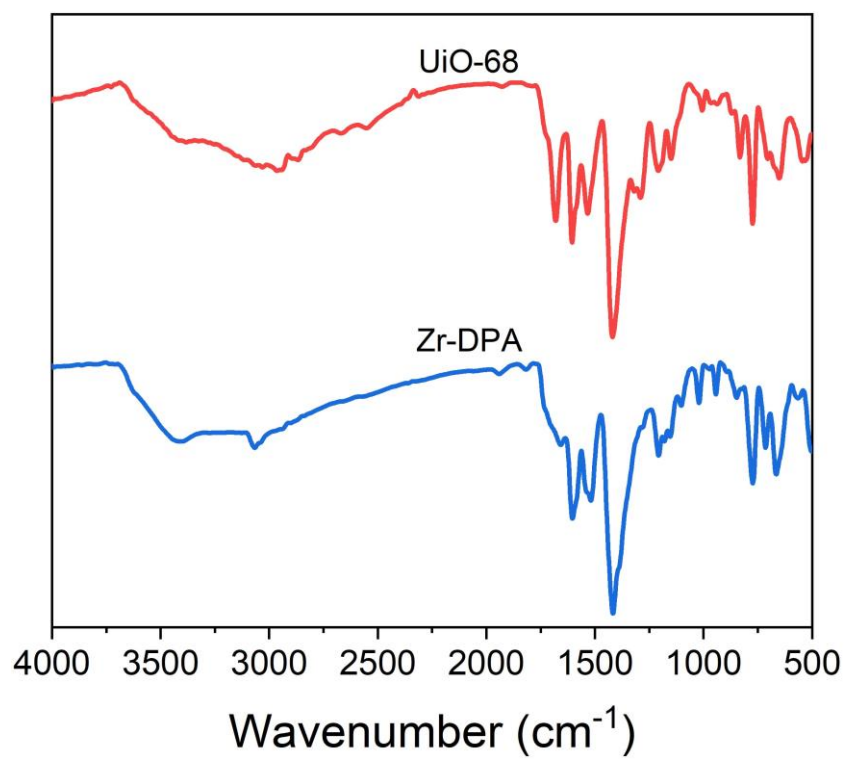

**Fig. S7** Infrared spectra of UiO-68 and Zr-DPA

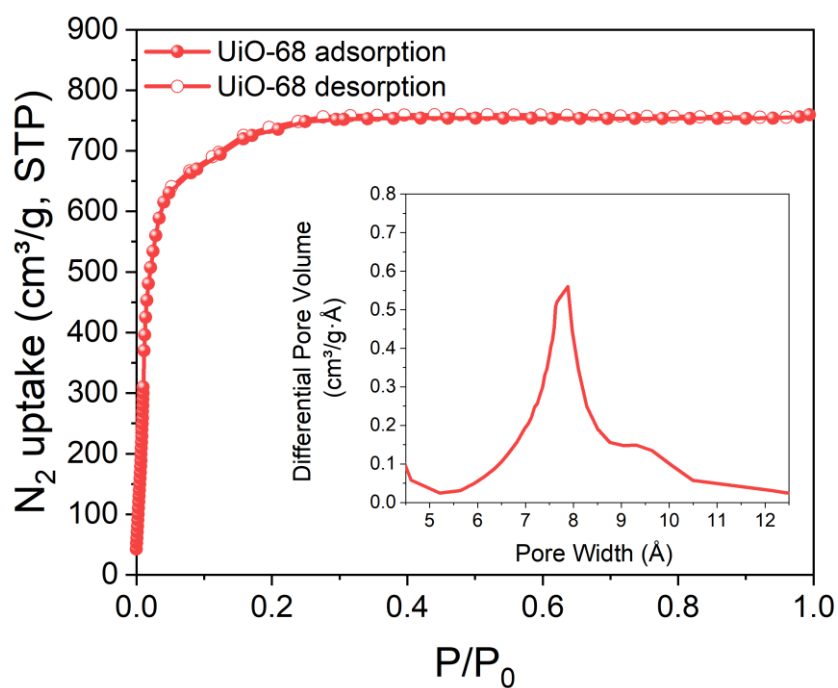

**Fig. S8** Nitrogen adsorption-desorption curves and microporous analysis of UiO-68

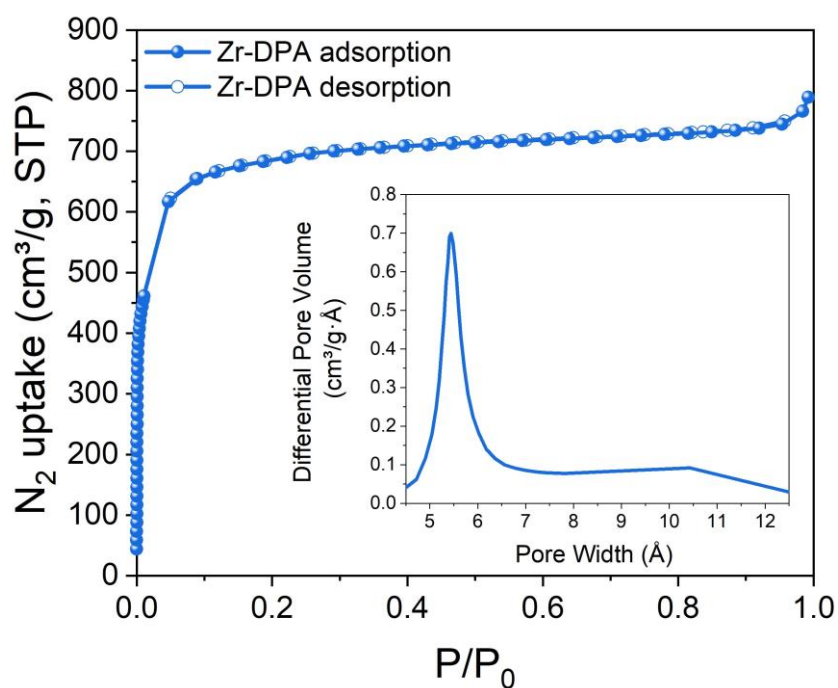

**Fig. S9** Nitrogen adsorption-desorption curves and microporous analysis of Zr-DPA

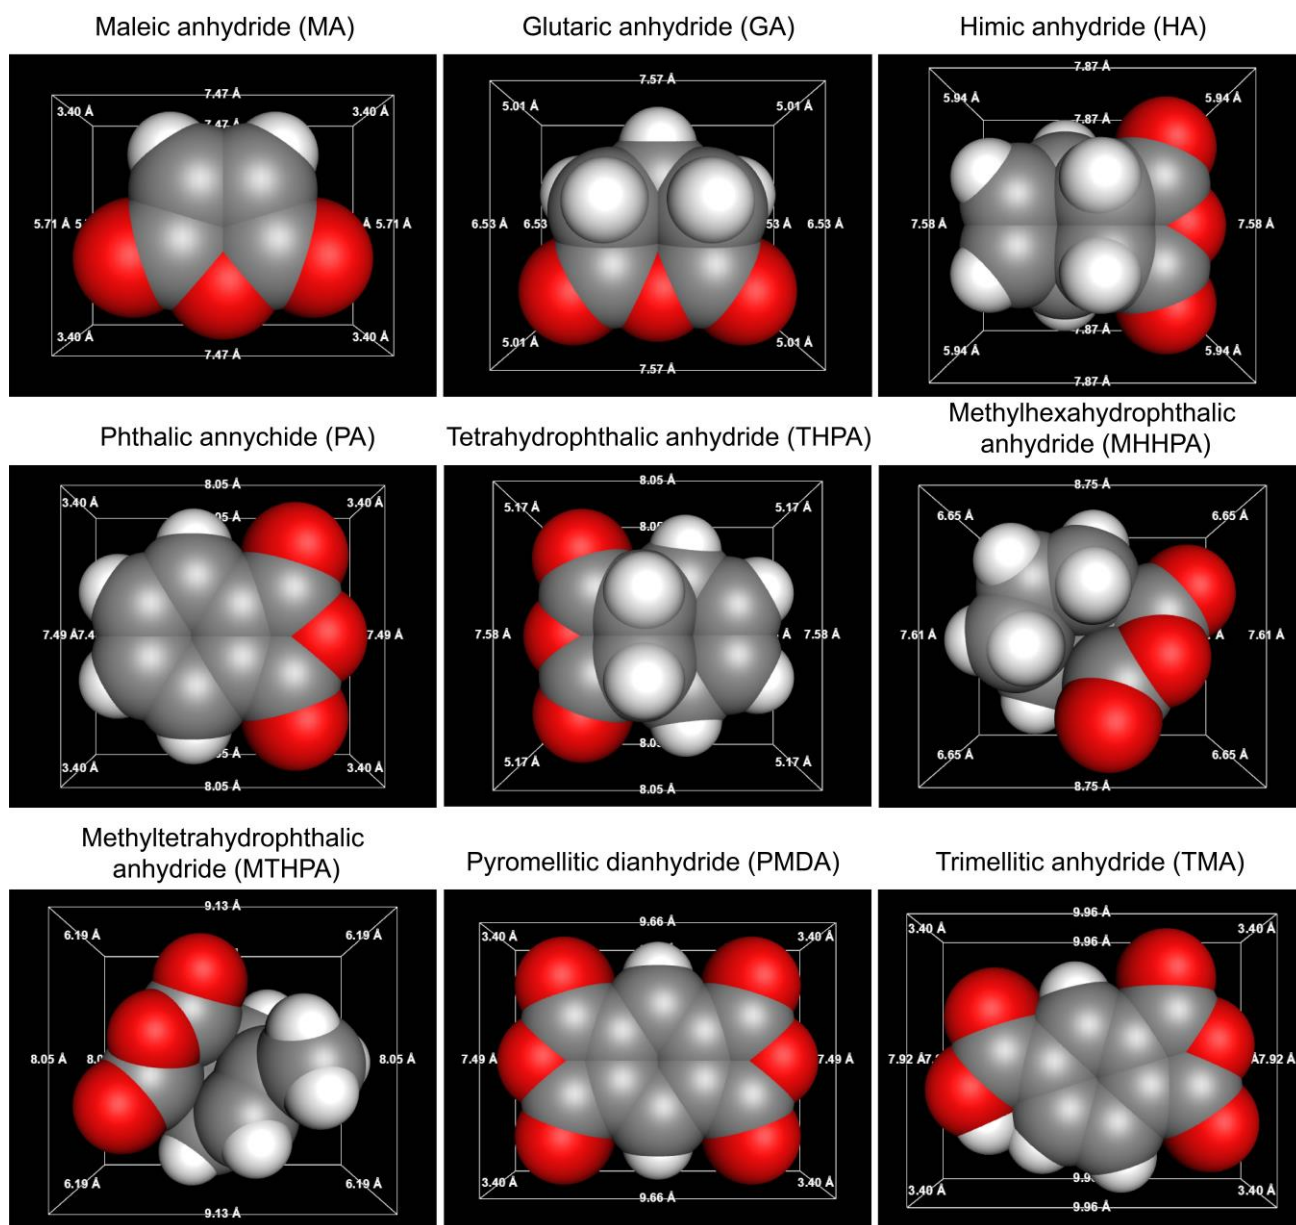

**Fig. S10** Molecular sizes of nine common epoxy anhydride curing agents

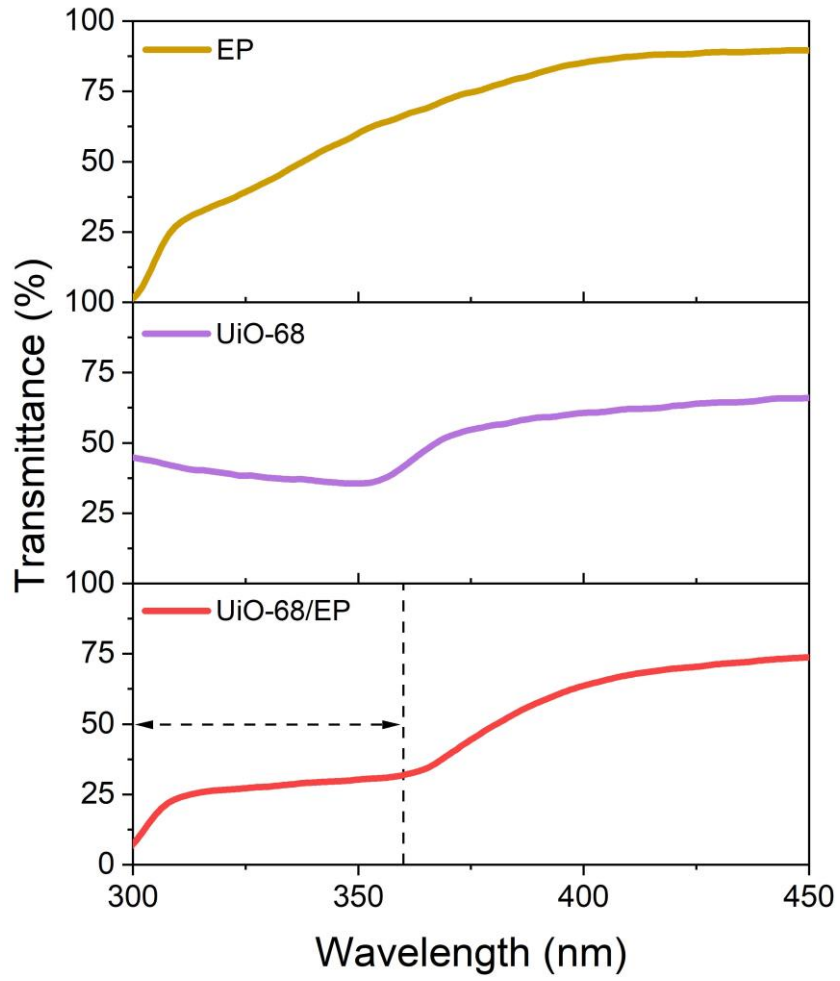

**Fig. S11** Construction process of UV shielding in UiO-68/EP



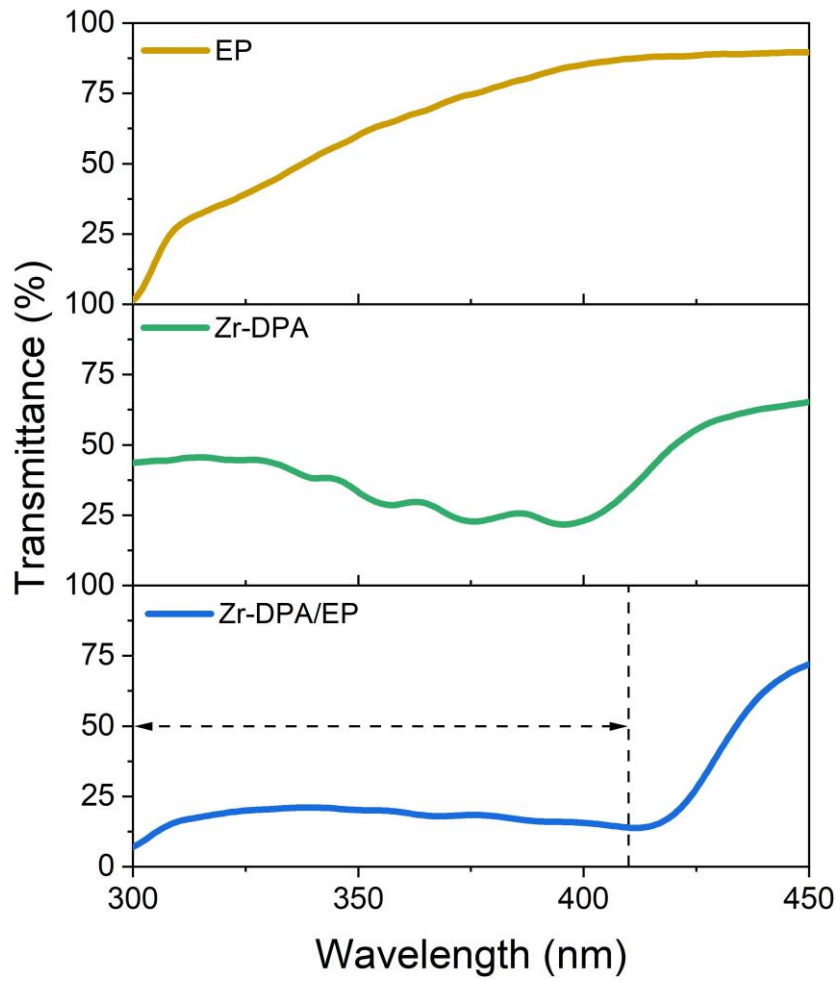

**Fig. S12** Construction process of UV shielding in Zr-DPA/EP

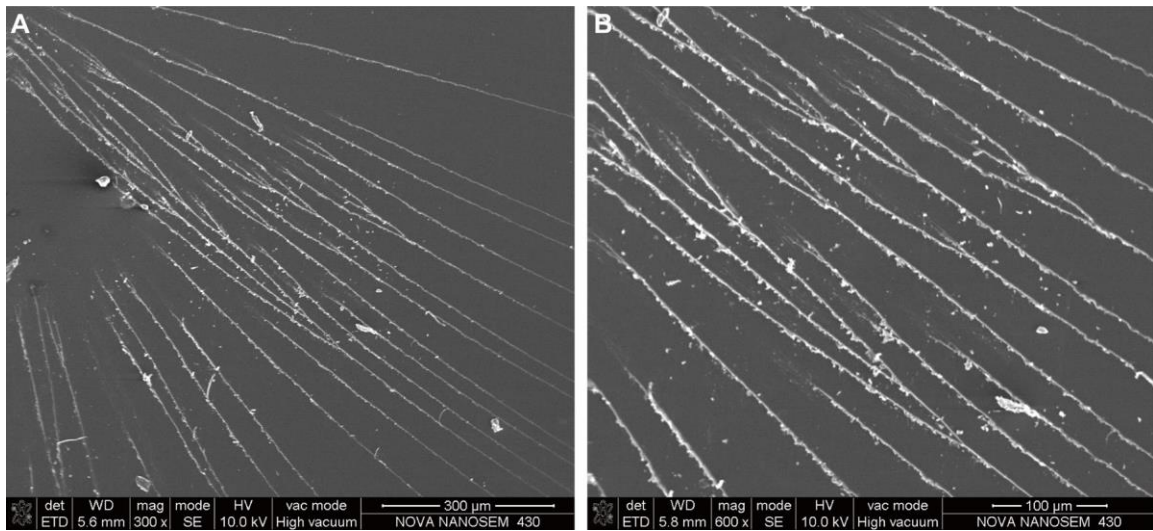

**Fig. S13** SEM micrographs of the fracture surface of pure EP at (A) 300x magnification and (B) 600x magnification.

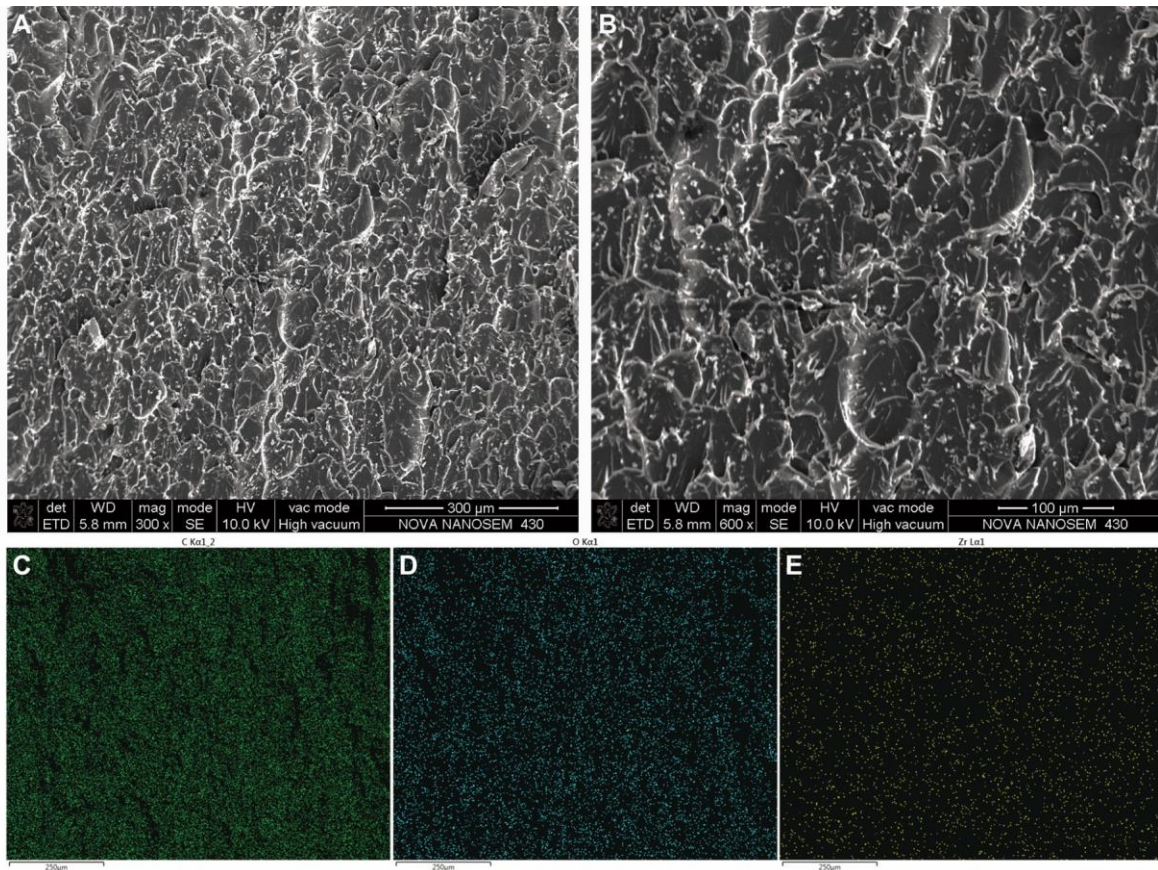

**Fig. S14** SEM micrographs of the fracture surface of UiO-68/EP at (A) 300x magnification and (B) 600x magnification. EDS mapping and elemental distributions of (C) C, (D) O and (E) Zr



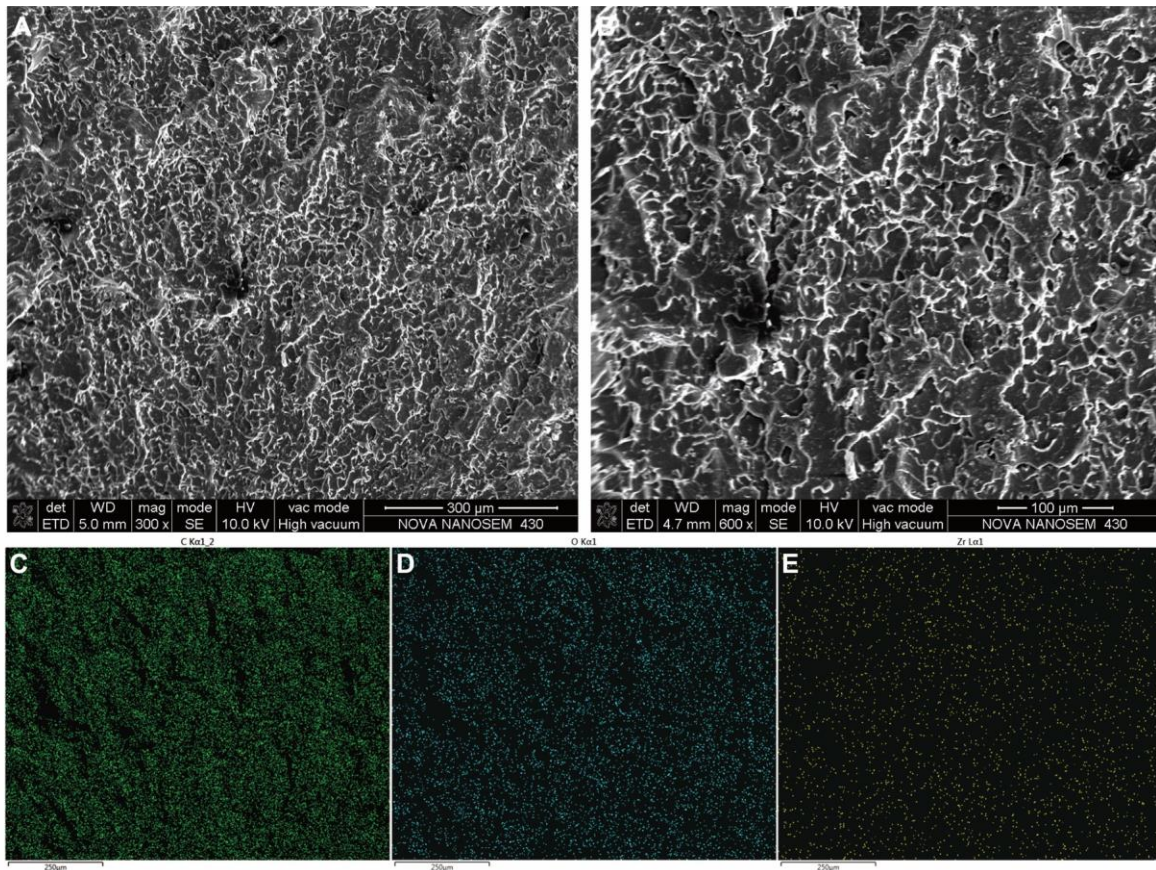

**Fig. S15** SEM micrographs of the fracture surface of Zr-DPA/EP at (A) 300x magnification and (B) 600x magnification. EDS mapping and elemental distributions of (C) C, (D) O and (E) Zr

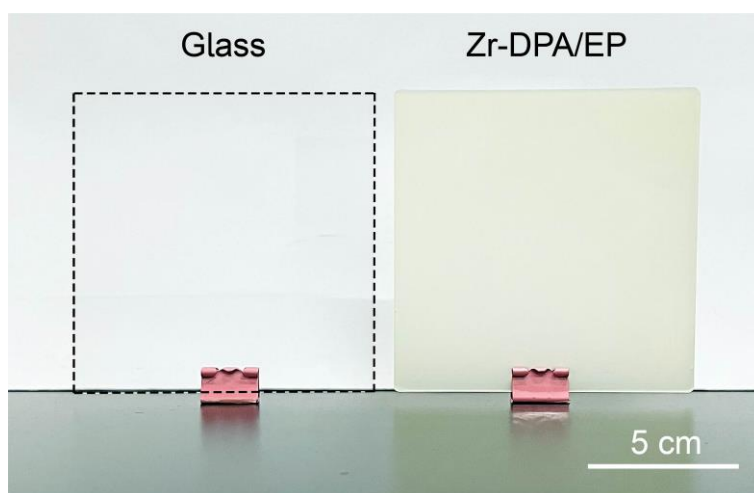

**Fig. S16** Photographs of glass and Zr-DPA/EP large samples

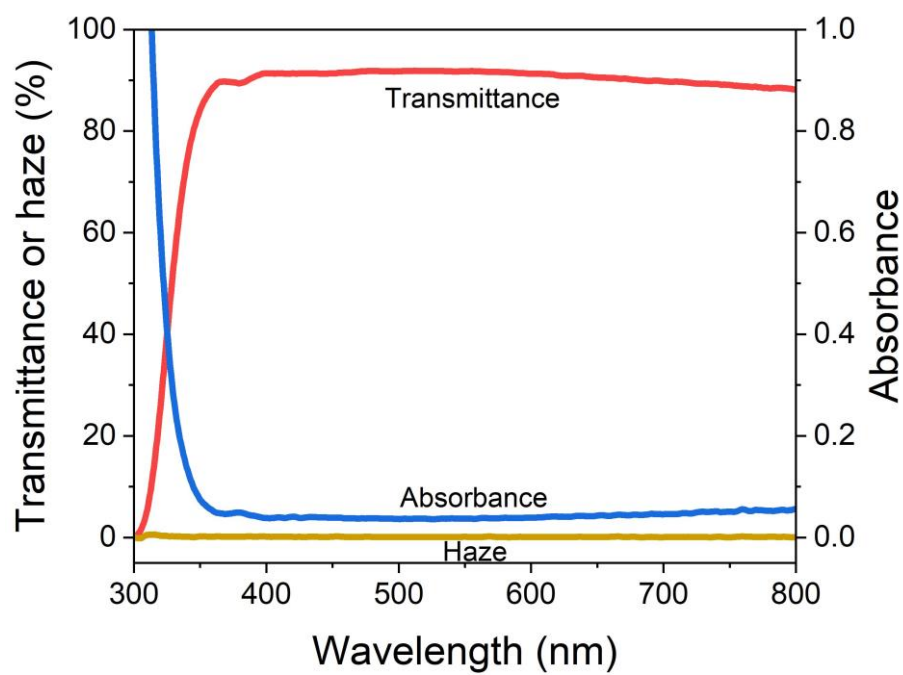

**Fig. S17** optical properties of glass

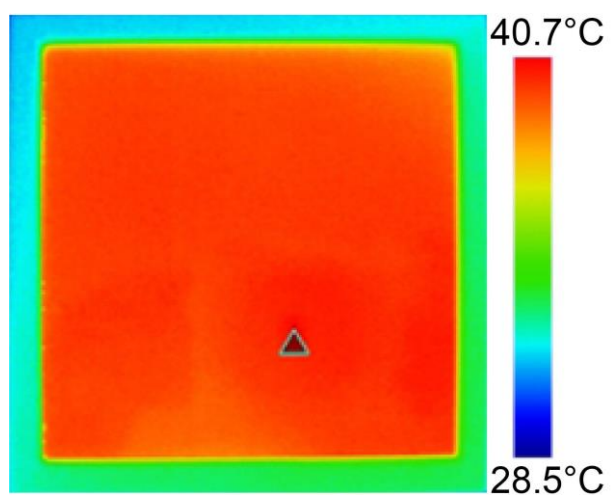

**Fig. S18** Infrared thermal imaging of glass after 30s on a hot plate

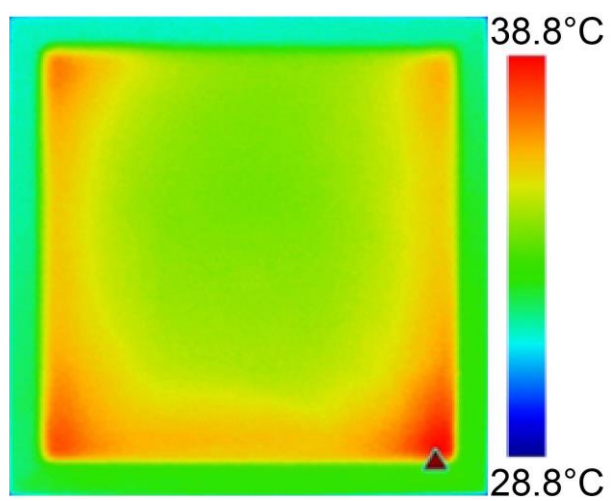

**Fig. S19** Infrared thermal imaging of Zr-DPA/EP after 30s on a hot plate

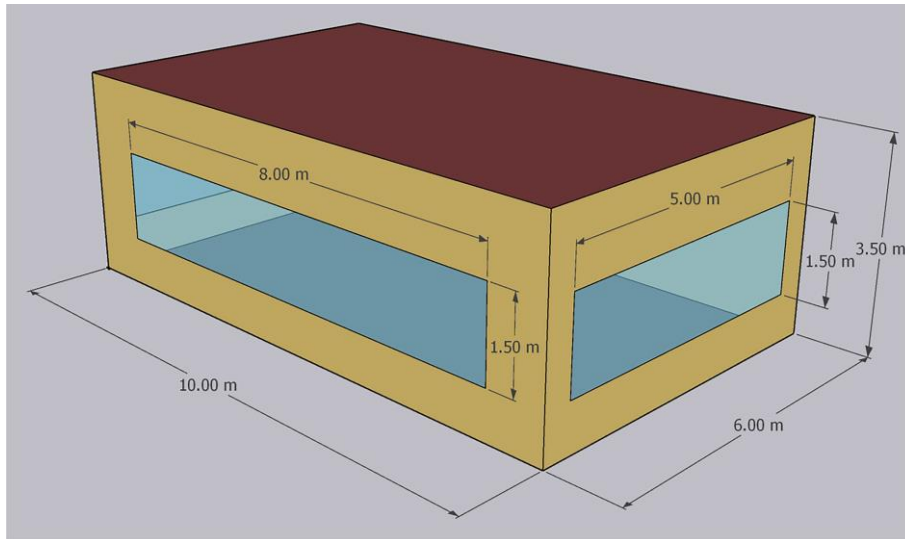

**Fig. S20** Building models for Energyplus simulation

**Table S1** Oxygen transmission rate (OTR) of the MOF/Polymer

| Samples   | OTR (mL m <sup>-2</sup> day <sup>-1</sup> ) |
|-----------|---------------------------------------------|
| Pure EP   | 26±4                                        |
| UiO-68/EP | 1600±300                                    |
| Zr-DPA/EP | 5700±1300                                   |



**Table S2** Comparison of this work with previously reported epoxy-containing optical composites in terms of transmittance and haze

| Materials                | Transmittance | Haze | Ref. (in main article) |
|--------------------------|---------------|------|------------------------|
| Solar-assisted TW*       | 90            | 60   | 25                     |
| MTB                      | 69            | 50   | 26                     |
| Aesthetic TW             | 80            | 93   | 27                     |
| Anisotropic TW           | 80            | 90   | 28                     |
| UFT                      | 80            | 58   | 29                     |
| PSMTW                    | 60            | 95   | 30                     |
| TBW                      | 88            | 74   | 31                     |
| EP/DDM/PB-5              | 67            | 22   | 32                     |
| EP-DDT7                  | 75            | 11   | 33                     |
| W/VO <sub>2</sub> -TPW-L | 68            | 97   | 34                     |
| EP/4DIT                  | 89            | 14   | 35                     |
| TB** with PTGE           | 79            | 72   | 36                     |
| Zr-DPA/EP                | 83            | 93   | This work              |

TW\* represents transparent wood filled with epoxy resin.

TB\*\* represents transparent bamboo filled with epoxy resin.

**Table S3** Comparison of this work with previously reported epoxy-containing composites for building in terms of thermal conductivity

| Materials                | Thermal conductivity ( $\text{W m}^{-1} \text{K}^{-1}$ ) | Ref. (in main article) |
|--------------------------|----------------------------------------------------------|------------------------|
| TB** with PTGE           | 0.35                                                     | 36                     |
| Clear wood               | 0.35                                                     | 37                     |
| TB with E51/DETA         | 0.33                                                     | 38                     |
| ESMTW*                   | 0.29                                                     | 39                     |
| TB with Ag-80/DDM        | 0.25                                                     | 40                     |
| Aesthetic TW             | 0.24                                                     | 27                     |
| Silica xerogel/epoxy     | 0.22                                                     | 41                     |
| W/VO <sub>2</sub> -TPW-L | 0.20                                                     | 34                     |
| TBW                      | 0.20                                                     | 31                     |
| Zr-DPA/EP                | 0.16                                                     | This work              |

TW\* represents transparent wood filled with epoxy resin.

TB\*\* represents transparent bamboo filled with epoxy resin.

**Table S4** Parameters of Zr-DPA/EP for EnergyPlus calculations

| Variables                 | Zr-DPA/EP |
|---------------------------|-----------|
| Solar Transmittance       | 0.76      |
| Solar Front Reflectance   | 0.08      |
| Solar Back Reflectance    | 0.08      |
| Visible Transmittance     | 0.83      |
| Visible Front Reflectance | 0.09      |
| Visible Back Reflectance  | 0.09      |
| Emissivity                | 0.85      |
